# Supplementary material for: Activation of Nrf2 in the liver is associated with stress resistance mediated by suppression of the growth hormone-regulated STAT5b transcription factor
Source: PubMed Central journal article supplement (PMC6095522; doi:10.1371/journal.pone.0200004), 2018-08-16
Supplement: pone.0200004.s002.pdf [file pone.0200004.s002.pdf]

1  
2  
3  
4 **Supplemental File 2**

5 **Activation of Nrf2 in the Liver is Associated with Stress Resistance Mediated by**  
6 **Suppression of the Growth Hormone-Regulated STAT5b Transcription Factor**

7 John Rooney, Keiyu Oshida<sup>1,2</sup>, Naresh Vasani<sup>1</sup>, Beena Vallanat<sup>1</sup>, Natalia Ryan<sup>1</sup>, Brian N.  
8 Chorley<sup>1</sup>, Xuting Wang<sup>3</sup>, Douglas A. Bell<sup>3</sup>, Kai C. Wu<sup>4</sup>, Lauren M. Aleksunes<sup>5</sup>, Curtis D.  
9 Klaassen<sup>6</sup>, Thomas W. Kensler<sup>7</sup>, and J. Christopher Corton<sup>1,8</sup>

10 <sup>1</sup>NHEERL, US-EPA, Research Triangle Park, NC 27711

11 <sup>2</sup>Present address: Toray Industries, Inc., Kanagawa, Japan

12 <sup>3</sup>Immunity, Inflammation, and Disease Laboratory, National Institute of Environmental Health  
13 Sciences, Research Triangle Park, NC 27709

14 <sup>4</sup>University of Kansas Medical Center, Kansas City, KS 66160 Present address: Janssen  
15 Pharmaceuticals, Spring House, PA 19477

16 <sup>5</sup>Rutgers University, Ernest Mario School of Pharmacy, Department of Pharmacology and  
17 Toxicology, Piscataway, NJ 08854

18 <sup>6</sup>University of Washington, Seattle, WA 98195

19 <sup>7</sup>Department of Pharmacology & Chemical Biology, School of Medicine, University of  
20 Pittsburgh, Pittsburgh, Pennsylvania 15261 Department of Pharmacology and Molecular  
21 Sciences, School of Medicine, The Johns Hopkins University, Baltimore, Maryland 21205

22  
23 **Classification analysis of Nrf2 activation using machine learning algorithms.**

24  
25 Nrf2 activation was predicted using 7 classification models as detailed in the Methods  
26 section. To determine the pcontribution of comparisons between chemically-treated wild-type  
27 and Nrf2-null samples, two training sets were used in the prediction models including the  
28 samples from livers of wild-type and Nrf2-null mice treated with CDDO-Im (Yates et al., 2009)  
29 and the same dataset excluding the control and treated Nrf2-null samples. The derived classifiers  
30 of 175 and 92 probe sets, respectively were then used to predict Nrf2 activation of test samples.  
31 An independent manually curated test set came from mice with known Nrf2 activation status.  
32 The models using the wild-type and Nrf2-null samples in the training set had excellent sensitivity  
33 (mean, 100%) but low specificity (specificity range, 30-94%; mean, 62%) (data not shown). The  
34 models using only the wild-type samples as the training set had lower sensitivity compared to  
35 using all samples (mean, 57%) but somewhat greater specificity (range, 71-84%; mean, 78%),  
36 indicating that the wild-type vs. null comparison of CDDO-Im treatment contributed to improved  
37 sensitivity in classification predictions. Because of the low specificity or sensitivity of the  
38 models, none were thought to be adequate for predicting Nrf2 activation of additional samples.

39  
40  
41 **Reference**  
42

43 Yates MS, Tran QT, Dolan PM, Osburn WO, Shin S, McCulloch CC, Silkworth JB, Taguchi K,  
44 Yamamoto M, Williams CR, Liby KT, Sporn MB, Sutter TR, Kensler TW. Genetic versus  
45 chemoprotective activation of Nrf2 signaling: overlapping yet distinct gene expression  
46 profiles between Keap1 knockout and triterpenoid-treated mice. *Carcinogenesis*. 2009  
47 Jun;30(6):1024-31.  
48
